# Supplementary material for: Outcome and Prognostic Factors for ETV6/RUNX1 Positive Pediatric Acute Lymphoblastic Leukemia Treated at a Single Institution in Korea
Source: PubMed Central journal article supplement — Cancer Res Treat. 2016 Aug 10;49(2):446–53. doi: 10.4143/crt.2016.211 (PMC5398401; doi:10.4143/crt.2016.211), 2016-08-10
Supplement: crt-2016-211-supple.pdf [file crt-2016-211-supple.pdf]

# Outcome and Prognostic Factors for *ETV6/RUNX1* Positive Pediatric Acute Lymphoblastic Leukemia Treated at a Single Institution in Korea

**Jae Wook Lee**, MD, PhD<sup>1</sup>, **Seong-koo Kim**, MD<sup>1</sup>, **Pil-Sang Jang**, MD, PhD<sup>1</sup>, **Nack-Gyun Chung**, MD, PhD<sup>1</sup>, **Dae-Chul Jeong**, MD, PhD<sup>1</sup>, **Myungshin Kim**, MD, PhD<sup>2</sup>, **Bin Cho**, MD, PhD<sup>1</sup>, **Hack-Ki Kim**, MD, PhD<sup>1</sup>

<sup>1</sup>*Division of Hematology and Oncology, Department of Pediatrics,*

<sup>2</sup>*Department of Laboratory Medicine, College of Medicine, The Catholic University of Korea, Seoul, Korea*

## Supplementary Data

### Table of Contents

|                             |   |
|-----------------------------|---|
| Supplementary Fig. S1 ..... | 2 |
| Supplementary Table 1 ..... | 2 |
| Supplementary Table 2 ..... | 3 |
| Supplementary Table 3 ..... | 3 |
| Supplementary Table 4 ..... | 4 |
| Supplementary Table 5 ..... | 5 |
| Supplementary Table 6 ..... | 6 |
| Supplementary Table 7 ..... | 6 |

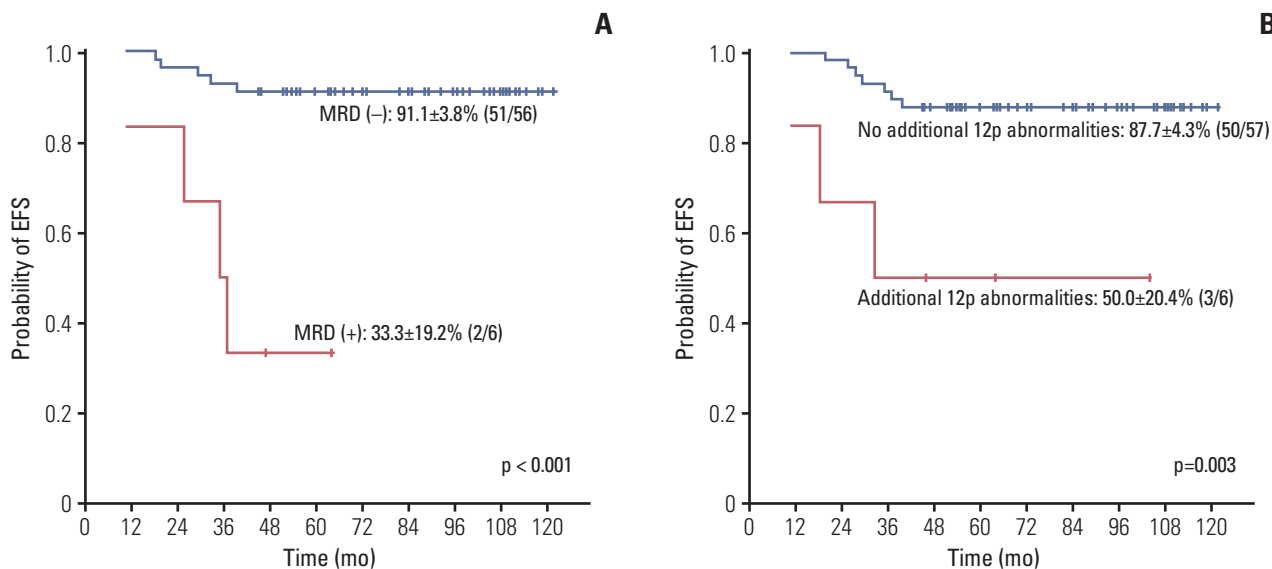

**Supplementary Fig. S1.** (A) Event-free survival (EFS) according to presence of minimal residual disease (MRD) at end of remission induction: MRD (-) 91.1±3.8% (51/56), MRD (+) 33.3±19.2% (2/6). (B) EFS according to presence of additional 12p structural abnormalities (translocations or inversions): without additional 12p structural abnormalities 87.7±4.3% (50/57), with additional 12p structural abnormalities 50.0±20.4% (3/6).

**Supplementary Table 1.** Risk group classification of ALL

| Risk group | Criteria                                                                                                                                                                                                                                                                                                                                                                                          |
|------------|---------------------------------------------------------------------------------------------------------------------------------------------------------------------------------------------------------------------------------------------------------------------------------------------------------------------------------------------------------------------------------------------------|
| Low        | All of the following:<br>Age ≥ 1 and < 10 years old<br>Initial WBC count < 50,000/mm <sup>3</sup><br>Trisomies of 4, 10, 17 or <i>ETV6/RUNX1</i> (+)                                                                                                                                                                                                                                              |
| Standard   | As above, except lack of trisomies of 4, 10, 17 or <i>ETV6/RUNX1</i> (+)                                                                                                                                                                                                                                                                                                                          |
| High       | Any of the following:<br>Age ≥ 10 and < 15 years old<br>Initial WBC count ≥ 50,000/mm <sup>3</sup> and < 100,000/mm <sup>3</sup><br>Initial CNS or testicular involvement<br>Precursor B cell ALL with poor prephase steroid response <sup>a)</sup><br><i>E2A/PBX1</i> (+)<br><i>MLL</i> rearrangement<br>MRD (+) at end of remission induction<br>T cell ALL with good prephase steroid response |
| Very high  | Any of the following:<br>Age ≥ 15 years old<br>Initial WBC count ≥ 100,000/mm <sup>3</sup><br><i>BCR/ABL1</i> (+) ALL<br>Infant ALL<br>Hypodiploidy with < 45 chromosomes<br>T cell ALL with poor prephase steroid response<br>CR not achieved after first remission induction                                                                                                                    |

ALL, acute lymphoblastic leukemia; WBC, white blood cell; CNS, central nervous system; MRD, minimal residual disease; CR, complete remission. <sup>a)</sup>Poor prephase steroid response indicates a peripheral blast count ≥ 1,000/mm<sup>3</sup> after 7 days of steroid treatment.

**Supplementary Table 2.** Remission induction and consolidation

| Drug                                        | Dose                                   | Day                            |
|---------------------------------------------|----------------------------------------|--------------------------------|
| <b>Prephase</b>                             |                                        |                                |
| Prednisolone (PO) <sup>a)</sup>             | 60 mg/m <sup>2</sup> (max. 80 mg)      | 1-7                            |
| Methotrexate/Cytarabine/Hydrocortisone (IT) | By age <sup>b)</sup>                   | 1                              |
| <b>Remission induction</b>                  |                                        |                                |
| Vincristine (IV)                            | 1.5 mg/m <sup>2</sup> (max. 2 mg)      | 1, 8, 15, 22                   |
| Daunorubicin (IV)                           | 45 mg/m <sup>2</sup>                   | 1                              |
| L-asparaginase (IM)                         | 6,000 U/m <sup>2</sup> (max. 10,000 U) | 2, 4, 6, 9, 11, 13, 16, 18, 20 |
| Prednisolone (PO)                           | 60 mg/m <sup>2</sup> (max. 80 mg)      | 1-21                           |
| Methotrexate (IT)                           | By age <sup>c)</sup>                   | 1, 22                          |
| <b>Consolidation</b>                        |                                        |                                |
| Cyclophosphamide (IV)                       | 1,000 mg/m <sup>2</sup>                | 1, 29                          |
| Cytarabine (IV)                             | 100 mg/m <sup>2</sup>                  | 1-5, 15-19, 29-33, 43-47       |
| Vincristine (IV)                            | 1.5 mg/m <sup>2</sup> (max. 2 mg)      | 15, 22, 43, 50                 |
| Prednisolone (PO)                           | 45 mg/m <sup>2</sup> (max. 60 mg)      | 22-26, 50-54                   |
| 6-Mercaptopurine (PO)                       | 60 mg/m <sup>2</sup>                   | 1-7, 29-35                     |
| Methotrexate (IT)                           | By age <sup>c)</sup>                   | 1, 15, 29, 43                  |

PO, per os; IT, intrathecal; IV, intravenous; IM, intramuscular. <sup>a)</sup>For patients diagnosed and treated from January 2009 onwards, prednisolone was used for treatment. However, for patients diagnosed from January 2005 to December 2008, dexamethasone was used at a dose of 8 mg/m<sup>2</sup>/day PO (max. 10 mg/day), <sup>b)</sup>Age-adjusted doses of triple intrathecal chemotherapy. Methotrexate: 6 mg (< 1 year), 7.5 mg (≥ 1 and < 2 years), 10 mg (≥ 2 and < 3 years), 12.5 mg (≥ 3 years); Cytarabine: 12 mg (< 1 year), 15 mg (≥ 1 and < 2 years), 20 mg (≥ 2 and < 3 years), 25 mg (≥ 3 years); Hydrocortisone: 12 mg (< 1 year), 15 mg (≥ 1 and < 2 years), 20 mg (≥ 2 and < 3 years), 25 mg (≥ 3 years), <sup>c)</sup>Age-adjusted doses of intrathecal methotrexate: 6 mg (< 1 year), 7.5 mg (≥ 1 and < 2 years), 10 mg (≥ 2 and < 3 years), 12.5 mg (≥ 3 years).

**Supplementary Table 3.** Post-consolidation: low risk

| Drug                           | Dose                                   | Day                      |
|--------------------------------|----------------------------------------|--------------------------|
| <b>Interim maintenance</b>     |                                        |                          |
| Vincristine (IV)               | 1.5 mg/m <sup>2</sup> (max. 2 mg)      | 1, 15                    |
| Methotrexate (IV)              | 5 g/m <sup>2</sup>                     | 1, 15                    |
| 6-Mercaptopurine (PO)          | 60 mg/m <sup>2</sup>                   | 29-77                    |
| Methotrexate (IT)              | By age <sup>a)</sup>                   | 1                        |
| <b>Delayed intensification</b> |                                        |                          |
| Vincristine (IV)               | 1.5 mg/m <sup>2</sup> (max. 2 mg)      | 1, 15, 29, 43            |
| Daunorubicin (IV)              | 30 mg/m <sup>2</sup>                   | 1, 29                    |
| Cytarabine (IV)                | 100 mg/m <sup>2</sup>                  | 1-5, 29-33               |
| Cyclophosphamide (IV)          | 1,200 mg/m <sup>2</sup>                | 15, 43                   |
| L-asparaginase (IM)            | 6,000 U/m <sup>2</sup> (max. 10,000 U) | 16, 18, 20, 44, 46, 48   |
| Prednisolone (PO)              | 45 mg/m <sup>2</sup> (max. 60 mg)      | 1-5, 15-19, 29-33, 43-47 |
| Methotrexate (IT)              | By age <sup>a)</sup>                   | 1, 29                    |

IV, intravenous; PO, per os; IT, intrathecal; IM, intramuscular. <sup>a)</sup>Age-adjusted doses of intrathecal methotrexate: 6 mg (< 1 year), 7.5 mg (≥ 1 and < 2 years), 10 mg (≥ 2 and < 3 years), 12.5 mg (≥ 3 years).

**Supplementary Table 4.** Post-consolidation: standard risk

| Drug                           | Dose                                   | Day                      |
|--------------------------------|----------------------------------------|--------------------------|
| <b>Interim maintenance</b>     |                                        |                          |
| Vincristine (IV)               | 1.5 mg/m <sup>2</sup> (max. 2 mg)      | 1, 15, 29                |
| Methotrexate (IV)              | 5 g/m <sup>2</sup>                     | 1, 15, 29                |
| 6-Mercaptopurine (PO)          | 60 mg/m <sup>2</sup>                   | 43-77                    |
| Methotrexate (IT)              | By age <sup>a)</sup>                   | 1, 15, 29                |
| <b>Delayed intensification</b> |                                        |                          |
| Vincristine (IV)               | 1.5 mg/m <sup>2</sup> (max. 2 mg)      | 1, 15, 29, 43            |
| Daunorubicin (IV)              | 30 mg/m <sup>2</sup>                   | 1, 15, 29, 43            |
| Cytarabine (IV)                | 100 mg/m <sup>2</sup>                  | 1-5, 29-33               |
| Cyclophosphamide (IV)          | 1,200 mg/m <sup>2</sup>                | 15, 43                   |
| L-asparaginase (IM)            | 6,000 U/m <sup>2</sup> (max. 10,000 U) | 16, 18, 20, 44, 46, 48   |
| Prednisolone (PO)              | 45 mg/m <sup>2</sup> (max. 60 mg)      | 1-5, 15-19, 29-33, 43-47 |
| Methotrexate (IT)              | By age <sup>a)</sup>                   | 1, 29                    |

IV, intravenous; PO, per os; IT, intrathecal; IM, intramuscular. <sup>a)</sup>Age-adjusted doses of intrathecal methotrexate: 6 mg (< 1 year), 7.5 mg (≥ 1 and < 2 years), 10 mg (≥ 2 and < 3 years), 12.5 mg (≥ 3 years).

**Supplementary Table 5.** Post-consolidation: high risk

| Drug                              | Dose                                   | Day                      |
|-----------------------------------|----------------------------------------|--------------------------|
| <b>Interim maintenance</b>        |                                        |                          |
| Vincristine (IV)                  | 1.5 mg/m <sup>2</sup> (max. 2 mg)      | 1, 15, 29                |
| Methotrexate (IV)                 | 5 g/m <sup>2</sup>                     | 1, 15, 29                |
| HD cytarabine (IV)                | 3 g/m <sup>2</sup> (q 12 hours)        | 43, 44                   |
| L-asparaginase (IM)               | 6,000 U/m <sup>2</sup> (max. 10,000 U) | 44                       |
| 6-Mercaptopurine (PO)             | 60 mg/m <sup>2</sup>                   | 64-77                    |
| Methotrexate (IT)                 | By age <sup>a)</sup>                   | 1, 15, 29, 43            |
| <b>Delayed intensification</b>    |                                        |                          |
| Vincristine (IV)                  | 1.5 mg/m <sup>2</sup> (max. 2 mg)      | 1, 15, 29, 43            |
| Daunorubicin (IV)                 | 30 mg/m <sup>2</sup>                   | 1, 15, 29, 43            |
| Cytarabine (IV)                   | 100 mg/m <sup>2</sup>                  | 1-5, 29-33               |
| Cyclophosphamide (IV)             | 1,200 mg/m <sup>2</sup>                | 15, 43                   |
| L-asparaginase (IM)               | 6,000 U/m <sup>2</sup> (max. 10,000 U) | 16, 18, 20, 44, 46, 48   |
| Prednisolone (PO)                 | 45 mg/m <sup>2</sup> (max. 60 mg)      | 1-5, 15-19, 29-33, 43-47 |
| Methotrexate (IT)                 | By age <sup>a)</sup>                   | 1, 29                    |
| <b>Interim maintenance-II</b>     |                                        |                          |
| Vincristine (IV)                  | 1.5 mg/m <sup>2</sup> (max. 2 mg)      | 1, 22                    |
| Methotrexate (IV)                 | 500 mg/m <sup>2</sup>                  | 1, 22                    |
| Prednisolone (PO)                 | 45 mg/m <sup>2</sup> (max. 60 mg)      | 1-5, 22-26               |
| 6-Mercaptopurine (PO)             | 60 mg/m <sup>2</sup>                   | 1-42                     |
| Methotrexate (IT)                 | By age <sup>a)</sup>                   | 1, 22                    |
| <b>Delayed intensification-II</b> |                                        |                          |
| Vincristine (IV)                  | 1.5 mg/m <sup>2</sup> (max. 2 mg)      | 1, 15                    |
| Daunorubicin (IV)                 | 30 mg/m <sup>2</sup>                   | 1, 15                    |
| Cytarabine (IV)                   | 100 mg/m <sup>2</sup>                  | 1-5                      |
| Cyclophosphamide (IV)             | 1,200 mg/m <sup>2</sup>                | 15                       |
| L-asparaginase (IM)               | 6,000 U/m <sup>2</sup> (max. 10,000 U) | 16, 18, 20, 30           |
| Prednisolone (PO)                 | 45 mg/m <sup>2</sup> (max. 60 mg)      | 1-5, 15-19               |
| HD cytarabine (IV)                | 3 g/m <sup>2</sup> (q 12 hours)        | 29, 30                   |
| Methotrexate (IT)                 | By age <sup>a)</sup>                   | 1, 29                    |

IV, intravenous; HD, high dose; IM, intramuscular; PO, per os; IT, intrathecal. <sup>a)</sup>Age-adjusted doses of intrathecal methotrexate: 6 mg (< 1 year), 7.5 mg (≥ 1 and < 2 years), 10 mg (≥ 2 and < 3 years), 12.5 mg (≥ 3 years).

**Supplementary Table 6.** Post-consolidation: very high risk

| Drug                              | Dose                                   | Day                      |
|-----------------------------------|----------------------------------------|--------------------------|
| <b>Interim maintenance</b>        |                                        |                          |
| HD cytarabine (IV)                | 3 g/m <sup>2</sup> (q 12 hours)        | 1, 2, 50, 51             |
| L-asparaginase (IM)               | 6,000 U/m <sup>2</sup> (max. 10,000 U) | 2, 51                    |
| Vincristine (IV)                  | 1.5 mg/m <sup>2</sup> (max. 2 mg)      | 22, 36                   |
| Methotrexate (IV)                 | 5 g/m <sup>2</sup>                     | 22, 36                   |
| Methotrexate (IT)                 | By age <sup>a)</sup>                   | 1, 22, 36, 50            |
| <b>Delayed intensification</b>    |                                        |                          |
| Vincristine (IV)                  | 1.5 mg/m <sup>2</sup> (max. 2 mg)      | 1, 15, 29, 43            |
| Daunorubicin (IV)                 | 30 mg/m <sup>2</sup>                   | 1, 15, 29, 43            |
| Cytarabine (IV)                   | 100 mg/m <sup>2</sup>                  | 1-5, 29-33               |
| Cyclophosphamide (IV)             | 1,200 mg/m <sup>2</sup>                | 15, 43                   |
| L-asparaginase (IM)               | 6,000 U/m <sup>2</sup> (max. 10,000 U) | 16, 18, 20, 44, 46, 48   |
| Prednisolone (PO)                 | 45 mg/m <sup>2</sup> (max. 60 mg)      | 1-5, 15-19, 29-33, 43-47 |
| Methotrexate (IT)                 | By age <sup>a)</sup>                   | 1, 29                    |
| <b>Interim maintenance-II</b>     |                                        |                          |
| HD cytarabine (IV)                | 3 g/m <sup>2</sup> (q 12 hours)        | 1, 2, 50, 51             |
| L-asparaginase (IM)               | 6,000 U/m <sup>2</sup> (max. 10,000 U) | 2, 51                    |
| Vincristine (IV)                  | 1.5 mg/m <sup>2</sup> (max. 2 mg)      | 22, 36                   |
| Methotrexate (IV)                 | 5 g/m <sup>2</sup>                     | 22, 36                   |
| Methotrexate (IT)                 | By age <sup>a)</sup>                   | 1, 22, 36, 50            |
| <b>Delayed intensification-II</b> |                                        |                          |
| Vincristine (IV)                  | 1.5 mg/m <sup>2</sup> (max. 2 mg)      | 1, 15                    |
| Daunorubicin (IV)                 | 30 mg/m <sup>2</sup>                   | 1, 15                    |
| Cytarabine (IV)                   | 100 mg/m <sup>2</sup>                  | 1-5                      |
| Cyclophosphamide (IV)             | 1,200 mg/m <sup>2</sup>                | 15                       |
| L-asparaginase (IM)               | 6,000 U/m <sup>2</sup> (max. 10,000 U) | 16, 18, 20, 30           |
| Prednisolone (PO)                 | 45 mg/m <sup>2</sup> (max. 60 mg)      | 1-5, 15-19               |
| HD cytarabine (IV)                | 3 g/m <sup>2</sup> (q 12 hours)        | 29, 30                   |
| Methotrexate (IT)                 | By age <sup>a)</sup>                   | 1, 29                    |

HD, high dose; IV, intravenous; IM, intramuscular; PO, per os; IT, intrathecal. <sup>a)</sup>Age-adjusted doses of intrathecal methotrexate: 6 mg (< 1 year), 7.5 mg (≥ 1 and < 2 years), 10 mg (≥ 2 and < 3 years), 12.5 mg (≥ 3 years).

**Supplementary Table 7.** Maintenance treatment (for 96 weeks)<sup>a)</sup>

| Drug                  | Dose                                         | Day            |
|-----------------------|----------------------------------------------|----------------|
| 6-Mercaptopurine (PO) | 60 mg/m <sup>2</sup>                         | Daily          |
| Methotrexate (PO)     | 25 mg/m <sup>2</sup>                         | Weekly         |
| Vincristine (IV)      | 1.5 mg/m <sup>2</sup> (max. 2 mg)            | Every 4 weeks  |
| Prednisolone (PO)     | 45 mg/m <sup>2</sup> (max. 60 mg) for 5 days | Every 4 weeks  |
| Methotrexate (IV)     | 3 g/m <sup>2</sup>                           | Every 12 weeks |
| Methotrexate (IT)     | By age <sup>3)</sup>                         | Every 12 weeks |

PO, per os; IV, intravenous; IT, intrathecal; HD, high dose. <sup>a)</sup>Maintenance treatment begins and ends with high dose methotrexate (3 g/m<sup>2</sup> IV), vincristine (1.5 mg/m<sup>2</sup> IV), prednisolone (45 mg/m<sup>2</sup> PO for 5 days), and IT methotrexate. A total of nine courses of high-dose methotrexate (HD-methotrexate) are administered during maintenance treatment. Oral methotrexate (25 mg/m<sup>2</sup> weekly) is omitted during the week of HD-methotrexate treatment. The regimen of maintenance treatment is common for all risk groups.
